# Supplementary figures and images for: Coordination-directed assembly of trigonal and tetragonal molecular boxes encapsulating anionic guests †
Source: Royal Society of Chemistry journal article supplement (doi:10.1039/b010118o), 2001-01-01

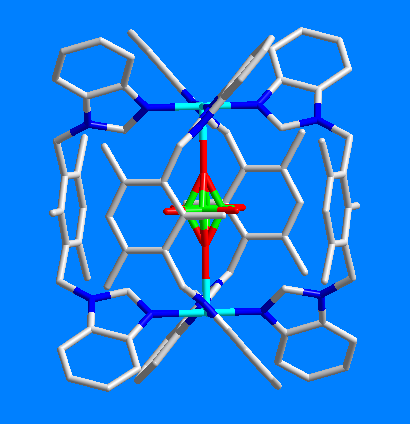

Supplement: b010118o-s3.doc [file b010118o-s3.doc]
